# Supplementary material for: Projection of Breast Cancer Burden due to Reproductive/Lifestyle Changes in Korean Women (2013-2030) Using an Age-Period-Cohort Model
Source: PubMed Central journal article supplement — Cancer Res Treat. 2018 Jan 22;50(4):1388–95. doi: 10.4143/crt.2017.162 (PMC6192937; doi:10.4143/crt.2017.162), 2018-01-22
Supplement: crt-2017-162-suppl1.pdf [file crt-2017-162-suppl1.pdf]

**S1 Table.** Projected DALYs, YLL, YLD trends, and AAPC of breast cancer in Korean women from 1999 to 2030

|                  | 1999 | 2000 | 2005 | 2010 | 2015 | 2020 | 2025 | 2030 | AAPC (95% CI)    |
|------------------|------|------|------|------|------|------|------|------|------------------|
| YLD per 100,000  | 50   | 66   | 128  | 194  | 278  | 350  | 401  | 423  | 5.38 (5.12-5.64) |
| YLL per 100,000  | 105  | 106  | 133  | 143  | 163  | 166  | 167  | 165  | 1.37 (1.06-1.69) |
| DALY per 100,000 | 155  | 171  | 262  | 336  | 441  | 516  | 567  | 588  | 3.84 (3.64-4.04) |

DALYs, disability-adjusted life years; YLL, years of life lost; YLD, years lived with disability; AAPC, average annual percent change; CI, confidence interval.
