# Supplementary material for: Projection of Breast Cancer Burden due to Reproductive/Lifestyle Changes in Korean Women (2013-2030) Using an Age-Period-Cohort Model
Source: PubMed Central journal article supplement — Cancer Res Treat. 2018 Jan 22;50(4):1388–95. doi: 10.4143/crt.2017.162 (PMC6192937; doi:10.4143/crt.2017.162), 2018-01-22
Supplement: crt-2017-162-suppl3.pdf [file crt-2017-162-suppl3.pdf]

**S3 Table.** Estimated average age of onset and duration of disability of breast cancer in 1999-2030

| Age group (yr) | 1999                      |                             | 2000                      |                             | 2005                      |                             | 2010                      |                             | 2015                      |                             | 2020                      |                             | 2025                      |                             | 2030                      |                             |
|----------------|---------------------------|-----------------------------|---------------------------|-----------------------------|---------------------------|-----------------------------|---------------------------|-----------------------------|---------------------------|-----------------------------|---------------------------|-----------------------------|---------------------------|-----------------------------|---------------------------|-----------------------------|
|                | Average age of onset (yr) | Duration of disability (yr) | Average age of onset (yr) | Duration of disability (yr) | Average age of onset (yr) | Duration of disability (yr) | Average age of onset (yr) | Duration of disability (yr) | Average age of onset (yr) | Duration of disability (yr) | Average age of onset (yr) | Duration of disability (yr) | Average age of onset (yr) | Duration of disability (yr) | Average age of onset (yr) | Duration of disability (yr) |
| 20-24          | 23.1                      | 7.3                         | 23.0                      | 9.8                         | 23.3                      | 11.2                        | 23.2                      | 7.2                         | 23.0                      | 29.0                        | 23.0                      | 36.2                        | 23.0                      | 40.1                        | 22.9                      | 43.9                        |
| 25-29          | 28.2                      | 3.7                         | 28.2                      | 5.7                         | 28.1                      | 8.3                         | 28.2                      | 8.8                         | 28.2                      | 24.7                        | 28.2                      | 31.0                        | 28.1                      | 35.0                        | 28.1                      | 38.9                        |
| 30-34          | 32.9                      | 2.3                         | 32.9                      | 4.4                         | 32.8                      | 7.8                         | 32.9                      | 11.4                        | 32.9                      | 20.6                        | 32.9                      | 26.4                        | 32.9                      | 30.3                        | 32.8                      | 34.3                        |
| 35-39          | 37.7                      | 2.6                         | 37.7                      | 5.3                         | 37.7                      | 8.6                         | 37.7                      | 10.2                        | 37.8                      | 16.4                        | 37.8                      | 21.6                        | 37.8                      | 25.5                        | 37.7                      | 29.5                        |
| 40-44          | 42.6                      | 4.3                         | 42.7                      | 6.2                         | 42.7                      | 7.8                         | 42.7                      | 9.0                         | 42.7                      | 12.2                        | 42.7                      | 16.8                        | 42.7                      | 20.8                        | 42.8                      | 24.7                        |
| 45-49          | 47.5                      | 4.7                         | 47.5                      | 5.5                         | 47.6                      | 6.6                         | 47.6                      | 8.1                         | 47.6                      | 9.2                         | 47.6                      | 12.4                        | 47.6                      | 16.1                        | 47.6                      | 20.1                        |
| 50-54          | 52.5                      | 4.2                         | 52.5                      | 4.7                         | 52.5                      | 5.2                         | 52.5                      | 7.0                         | 52.5                      | 7.7                         | 52.5                      | 9.1                         | 52.5                      | 11.7                        | 52.5                      | 15.4                        |
| 55-59          | 57.4                      | 4.0                         | 57.4                      | 4.3                         | 57.4                      | 4.6                         | 57.4                      | 5.9                         | 57.5                      | 6.8                         | 57.5                      | 7.4                         | 57.5                      | 8.8                         | 57.5                      | 11.0                        |
| 60-64          | 62.4                      | 4.0                         | 62.4                      | 4.1                         | 62.4                      | 4.4                         | 62.4                      | 5.0                         | 62.4                      | 6.0                         | 62.5                      | 6.6                         | 62.5                      | 7.3                         | 62.5                      | 8.2                         |
| 65-69          | 67.4                      | 3.8                         | 67.4                      | 3.8                         | 67.4                      | 3.7                         | 67.4                      | 4.0                         | 67.4                      | 5.3                         | 67.4                      | 5.7                         | 67.4                      | 6.3                         | 67.5                      | 6.8                         |
| 70-74          | 72.4                      | 2.9                         | 72.4                      | 3.0                         | 72.4                      | 3.1                         | 72.4                      | 3.3                         | 72.4                      | 4.4                         | 72.4                      | 4.6                         | 72.4                      | 5.0                         | 72.4                      | 5.4                         |
| 75-79          | 77.4                      | 2.5                         | 77.4                      | 2.6                         | 77.4                      | 3.1                         | 77.4                      | 3.0                         | 77.4                      | 3.4                         | 77.4                      | 3.4                         | 77.4                      | 3.7                         | 77.4                      | 4.0                         |
| 80-84          | 82.4                      | 2.1                         | 82.5                      | 2.2                         | 82.4                      | 2.5                         | 82.4                      | 2.4                         | 82.4                      | 2.2                         | 82.4                      | 2.2                         | 82.4                      | 2.3                         | 82.4                      | 2.5                         |
| ≥85            | 92.9                      | 1.3                         | 96.0                      | 1.6                         | 93.8                      | 1.7                         | 94.1                      | 1.7                         | 93.4                      | 1.7                         | 94.7                      | 1.7                         | 95.5                      | 1.8                         | 95.9                      | 2.0                         |
| Total          | 48.5                      | 3.8                         | 49.1                      | 5.0                         | 50.0                      | 6.2                         | 51.5                      | 7.3                         | 53.4                      | 8.8                         | 55.7                      | 10.0                        | 58.0                      | 11.0                        | 60.5                      | 11.9                        |
